# Supplementary material
Source: Springer Nature journal article supplement (https://www.springermedizin.de/resource/supplementary/12913_2011_2030_MOESM2_ESM.pdf/9529656)

*Starting Cohort*

165,089 surviving births at 6 NC  
KPMCP hospitals with neonatal  
ICUs between 1996 - 2004

*Excluded*

81 missing information

2,393 born <32 weeks GA

39,340 did not meet predefined  
membership criteria

11 episodes duration >60 days

*Final Cohort*

123,264 Infants

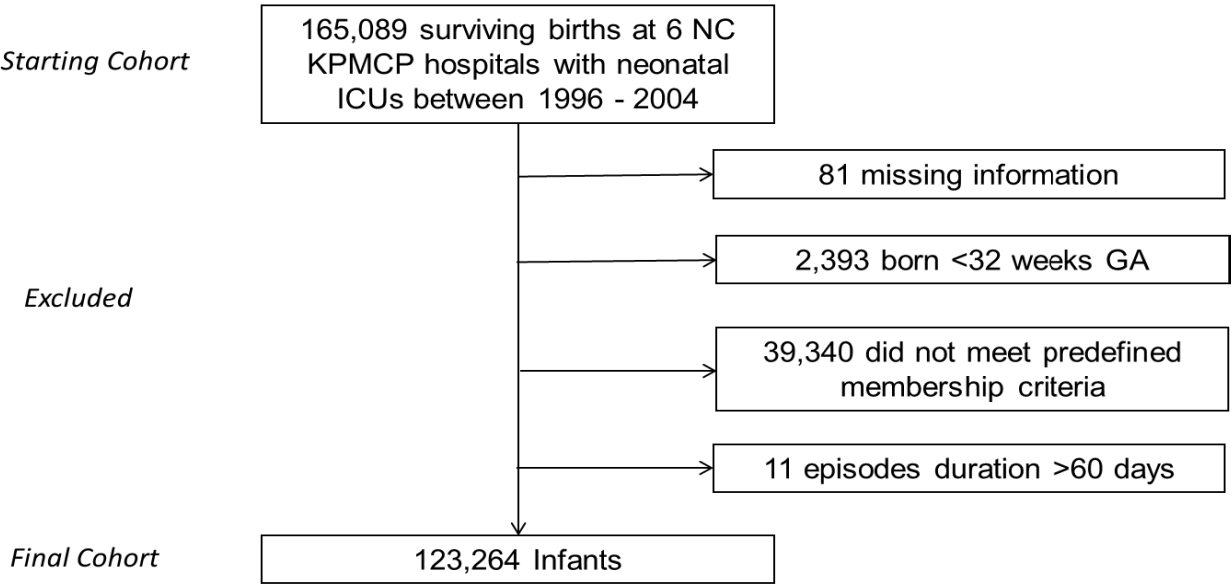

*Starting Cohort*

165,089 surviving births at 6 NC  
KPMCP hospitals with neonatal  
ICUs between 1996 - 2004

*Excluded*

81 missing information

2,393 born <32 weeks GA

39,340 did not meet predefined  
membership criteria

11 episodes duration >60 days

*Final Cohort*

123,264 Infants



Supplement: MOESM2 [file 9529656]
